# Supplementary material for: Tuning phase compositions of MoS2 nanomaterials for enhanced heavy metal removal: performance and mechanism
Source: Royal Society of Chemistry journal article supplement (doi:10.1039/d2cp00705c), 2022-01-01
Supplement: d2cp00705c1.pdf [file d2cp00705c1.pdf]

Supplementary Information for

## **Tuning Phase Compositions of MoS<sub>2</sub> Nanomaterials for Enhanced Heavy Metal Removal: Performance and Mechanism**

Qi Han<sup>a,#</sup>, Hao Cao<sup>b,#</sup>, Yuchen Sun<sup>a</sup>, Gang Wang<sup>c</sup>, Sidney Poon<sup>d</sup>, Monong Wang<sup>d</sup>,  
Bei Liu<sup>a</sup>, Yanggang Wang<sup>b</sup>, Zhongying Wang<sup>a\*</sup>, Baoxia Mi<sup>d</sup>

<sup>a</sup> Department of Environmental Science and Engineering, Southern University of Science and Technology, Shenzhen 518055, China

<sup>b</sup> Department of Chemistry and Guangdong Provincial Key Laboratory of Catalytic Chemistry, Southern University of Science and Technology, Shenzhen 518055, China

<sup>c</sup> Department of Physics, Southern University of Science and Technology, Shenzhen 518055, China

<sup>d</sup> Department of Civil and Environmental Engineering, University of California, Berkeley, California 94720, United States

---

\* to whom correspondence should be addressed. e-mail: [wangzy6@sustech.edu.cn](mailto:wangzy6@sustech.edu.cn); tel.: +86-075588018040;

## Table of Content

|                                       |                                                                                                                                             |     |
|---------------------------------------|---------------------------------------------------------------------------------------------------------------------------------------------|-----|
| <b>1. Supplementary Texts</b>         |                                                                                                                                             |     |
| Text S1                               | Synthesis of MoS <sub>2</sub> with different S/Mo precursor atomic ratio                                                                    | S2  |
| <b>2. Supplementary Tables</b>        |                                                                                                                                             |     |
| Table S1                              | Synthesis of MoS <sub>2</sub> with different S/Mo precursor atomic ratio                                                                    | S2  |
| Table S2                              | Pb <sup>2+</sup> removal performance by other common materials.                                                                             | S2  |
| Table S3                              | Pb <sup>2+</sup> removal performance by MoS <sub>2</sub> nanosheets and composites.                                                         | S3  |
| Table S4                              | Comparison of E <sub>ads</sub> between vacuum and implicit solvation model.                                                                 | S3  |
| <b>3. Supplementary Figures S1-S6</b> |                                                                                                                                             |     |
| Figure S1.                            | Mo 3d XPS spectra of hydrothermally synthesized MoS <sub>2</sub>                                                                            | S4  |
| Figure S2.                            | Optical images of 1T- and 2H-MoS <sub>2</sub> aqueous suspensions                                                                           | S5  |
| Figure S3.                            | HAADF and EDS mapping of 2H-MoS <sub>2</sub>                                                                                                | S5  |
| Figure S4.                            | Removal kinetics of Ag <sup>+</sup> by 1T- and 2H-MoS <sub>2</sub>                                                                          | S6  |
| Figure S5.                            | Removal kinetics of Pb <sup>2+</sup> by 1T- and 2H-MoS <sub>2</sub>                                                                         | S6  |
| Figure S6.                            | Second-order kinetic fitting curves of the heavy metal ions removal by MoS <sub>2</sub>                                                     | S7  |
| Figure S7.                            | Langmuir fitting of adsorption curves of heavy metal ions by MoS <sub>2</sub>                                                               | S8  |
| Figure S8.                            | Pb <sup>2+</sup> removals by 1T-MoS <sub>2</sub> nanosheets at different pH conditions.                                                     | S9  |
| Figure S9.                            | Ag <sup>+</sup> and Pb <sup>2+</sup> removals by 1T-MoS <sub>2</sub> nanosheets at different temperatures.                                  | S9  |
| Figure S10.                           | Removal kinetics of Pb <sup>2+</sup> by 1T-MoS <sub>2</sub> within 1 d.                                                                     | S10 |
| Figure S11.                           | Co-existing experiment Ag <sup>+</sup> and Pb <sup>2+</sup> removal with 1T-MoS <sub>2</sub> containing different concentration of cations. | S10 |
| Figure S12.                           | Pb removals by stacked MoS <sub>2</sub> and EDTA recovery efficiency in 7 consecutive tests.                                                | S11 |
| Figure S13.                           | SEM images and EDS mapping after removal reaction                                                                                           | S11 |
| Figure S14.                           | XRD patterns of 1T- and 2H-MoS <sub>2</sub> before and after Ag <sup>+</sup> removal.                                                       | S12 |
| Figure S15.                           | XRD patterns of 1T- and 2H-MoS <sub>2</sub> before and after Pb <sup>2+</sup> removal.                                                      | S12 |
| Figure S16.                           | N <sub>2</sub> adsorption isotherm and BET surface area of 1T- and 2H-MoS <sub>2</sub>                                                      | S13 |
| Figure S17.                           | Powder X-ray Diffraction of 1T-MoS <sub>2</sub> dried in air                                                                                | S13 |
| Figure S18.                           | Powder X-ray Diffraction of 1T-MoS <sub>2</sub> dried in glove-box                                                                          | S14 |
| Figure S19.                           | Crystal structure of 1T-MoS <sub>2</sub> in x-y plane and z direction                                                                       | S14 |
| Figure S20.                           | Contact angle measurements of 1T- and 2H-MoS <sub>2</sub>                                                                                   | S15 |
| Figure S21.                           | The schematic illustration of the formation process of spacing-varied nanochannels in 1T- and 2H-MoS <sub>2</sub> samples.                  | S15 |
| Figure S22.                           | Removal capacities of Ag <sup>+</sup> and Pb <sup>2+</sup> by dried 1T, 2H-MoS <sub>2</sub>                                                 | S16 |
| Figure S23.                           | The projected densities of states analysis of sorbed Ag and Pb                                                                              | S16 |

|             |                                                                              |     |
|-------------|------------------------------------------------------------------------------|-----|
| Figure S24. | The projected densities of states analysis of 1T- and 2H-MoS <sub>2</sub>    | S17 |
| Figure S25  | The work-functions ( $\Phi$ ) of 1T-MoS <sub>2</sub> and 2H-MoS <sub>2</sub> | S17 |

---

### Text 1. Synthesis of MoS<sub>2</sub> with different S/Mo precursor atomic ratio

For the synthesis of MoS<sub>2</sub> using S/Mo precursor atomic ratios of 1:1, 3:1, 5:1, 10:1, a certain amount of thioacetamide and ammonium heptamolybdate tetrahydrate were dissolved in 24 mL deionized water. The mixture was stirred in a magnetic stirring apparatus for 1h, and the mixed solution was then transferred to a 50 mL Teflon-lined stainless-steel autoclave and heated at 180 °C, 200 °C, 220 °C or 240 °C for 12 h. After the reaction, the system was terminated by natural cooling to room temperature. The as-synthesized MoS<sub>2</sub> was collected in a centrifuge tube and washed with deionized water and ethanol several times by repeatedly centrifuging, decanting the liquid, and resuspending the solids. The purified samples were stored in DI water in an N<sub>2</sub>-filled glove-box. The addition of thioacetamide and ammonium heptamolybdate tetrahydrate was listed in Table S1.

Table S1 Synthesis of MoS<sub>2</sub> with different S/Mo precursor atomic ratio

| S/Mo                                      | 1:1  | 2:1   | 3:1   | 5:1   | 10:1  |
|-------------------------------------------|------|-------|-------|-------|-------|
| Thioacetamide/mmol                        | 8.60 | 17.17 | 20.23 | 20.23 | 20.23 |
| Ammonium heptamolybdate tetrahydrate/mmol | 1.23 | 1.23  | 0.96  | 0.58  | 0.29  |

Table S2. Pb<sup>2+</sup> removal performance by other common adsorbent materials.

| Adsorbent                              | Max capacity                         | Removal mechanism                              | Reference |
|----------------------------------------|--------------------------------------|------------------------------------------------|-----------|
| Hydrothermal MoS <sub>2</sub>          | 632.91 mg/g (1T) and 81.63 mg/g (2H) | Electrostatic adsorption and S-Pb complexation | this work |
| δ-MnO <sub>2</sub>                     | 10.2 mg/g                            | Electrostatic adsorption                       | 1         |
| AC/nZVI                                | 59.35 mg/g                           | Electrostatic adsorption                       | 2         |
| Amio-Fe <sub>3</sub> O <sub>4</sub>    | 40.10 mg/g                           | Electrostatic adsorption                       | 3         |
| Polyaniline grafted chitosan           | 16.07 mg/g                           | Electrostatic Adsorption                       | 4         |
| XC-72 carbon                           | 125.0 mg/g                           | Adsorption and precipitation                   | 5         |
| Fe <sub>3</sub> O <sub>4</sub> @TMU-32 | 1600 mg/g                            | Electrostatic adsorption                       | 6         |
| Magnetic GO                            | 385.1 mg/g                           | Electrostatic adsorption                       | 7         |
| Thiol-modified biochar                 | 55.4 mg/g                            | S-Pb complexation                              | 8         |

Table S3. Pb<sup>2+</sup> removal performance by MoS<sub>2</sub> nanosheets and composites.

| Adsorbent                                                     | Max capacity                               | Removal mechanism                              | Reference |
|---------------------------------------------------------------|--------------------------------------------|------------------------------------------------|-----------|
| Hydrothermal MoS <sub>2</sub>                                 | 632.91 mg/g (1T) and 81.63 mg/g (2H)       | Electrostatic adsorption and S-Pb complexation | this work |
| Chemical exfoliated MoS <sub>2</sub>                          | ~740 mg/g                                  | S-Pb complexation, membrane separation         | 9         |
| Calcined MoS <sub>2</sub>                                     | ~147.09 mg/g and 64.16 mg/g                | S-Pb complexation                              | 10        |
| Hollow MoS <sub>2</sub>                                       | ~1267 mg/g                                 | S-Pb complexation                              | 11        |
| Hydrothermal MoS <sub>2</sub>                                 | 26.0 mg/g and 152.0 mg/g                   | S-Pb complexation                              | 12        |
| MoS <sub>2</sub> -N-H                                         | 303.04 mg/g                                | Pb-S complexation and electrostatic adsorption | 13        |
| Hydrothermal MoS <sub>2</sub>                                 | ~293 mg/g                                  | Electrostatic adsorption                       | 14        |
| ferrite-MoS <sub>2</sub> -carbon                              | 588.24 mg/g for MnFMC and 660.67 for CoFMC | Inner-sphere complexation and ion-exchange     | 15        |
| rGO@MoS <sub>2</sub>                                          | 498 mg/g                                   | Surface complexation                           | 16        |
| MoS <sub>2</sub> @biochar                                     | 189 mg/g                                   | Metal-sulfur chemical complexation             | 17        |
| MoS <sub>2</sub> @Fe <sub>3</sub> O <sub>4</sub>              | 240.7 mg/g                                 | Surface complexation                           | 18        |
| Fe <sub>3</sub> O <sub>4</sub> @polydopamine-MoS <sub>2</sub> | 508.9 mg/g                                 | Ion exchange and surface complexation          | 19        |
| MoS <sub>2</sub> /clinoptilolite                              | 50 mg/g                                    | Surface complexation                           | 20        |
| MoS <sub>2</sub> /Fe <sub>3</sub> O <sub>4</sub>              | 263.6 mg/g                                 | Metal-sulfur chemical complexation             | 21        |

Table S4. The comparison of E<sub>ads</sub> between vacuum model and implicit solvation model.

| Model                     | E <sub>ads</sub> (vacuum), eV | E <sub>ads</sub> (vaspsol), eV |
|---------------------------|-------------------------------|--------------------------------|
| MoS <sub>2</sub> -Ag (1T) | -4.52                         | -6.72                          |
| MoS <sub>2</sub> -Pb (1T) | -6.12                         | -9.47                          |
| MoS <sub>2</sub> -Ag (2H) | -0.90                         | -1.00                          |
| MoS <sub>2</sub> -Pb (2H) | -1.34                         | -1.69                          |

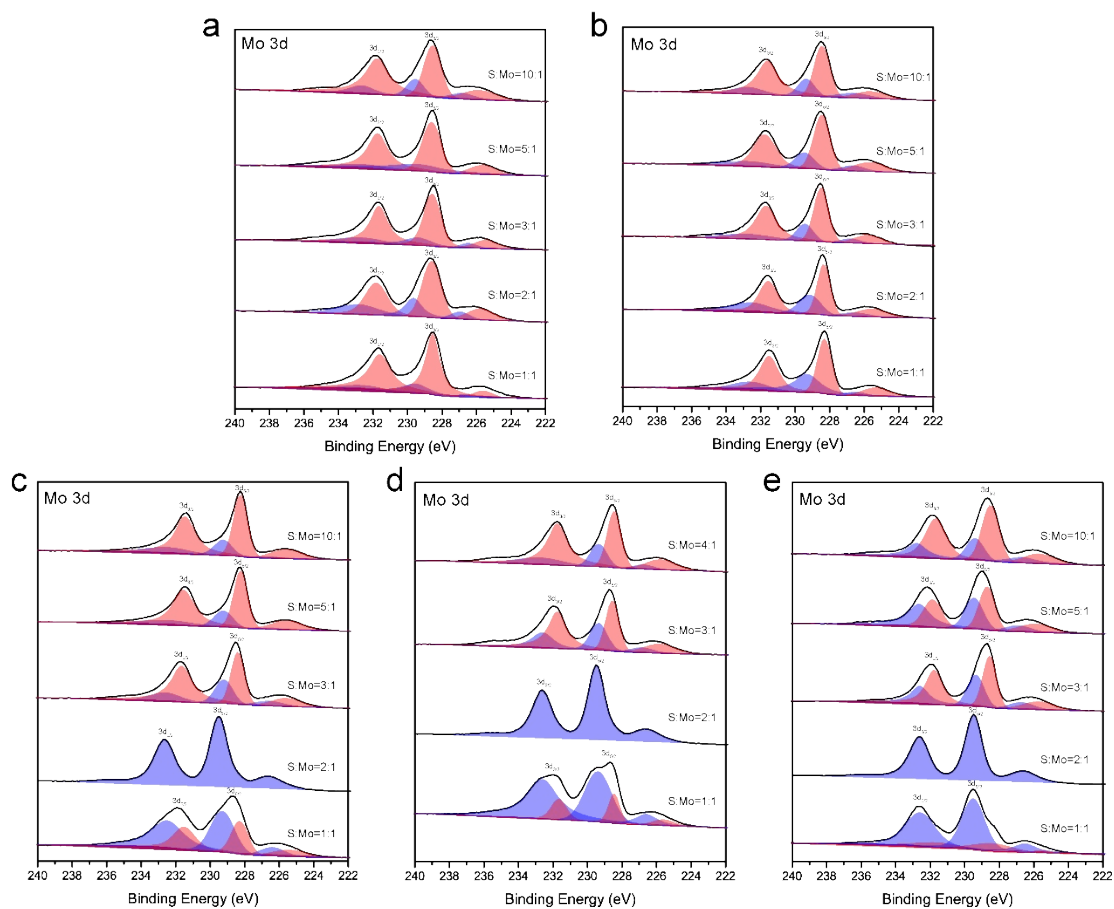

Figure S1. Mo 3d XPS spectra of as-synthesized MoS<sub>2</sub> samples at S/Mo precursor atomic ratios from 1 to 10 and synthesis temperatures of 180°C (a), 200°C (b), 220°C (c), 230°C (d), and 240°C (e).

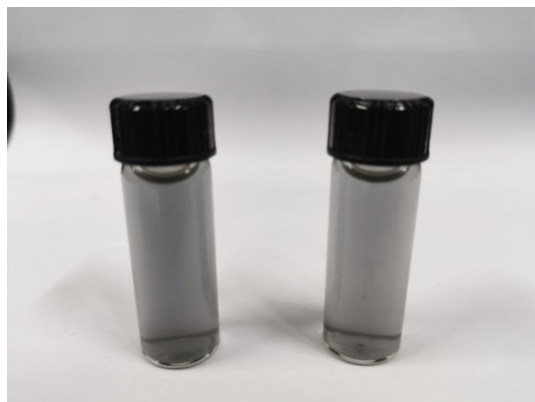

Figure S2. 1T-MoS<sub>2</sub> (left) and 2H-MoS<sub>2</sub> (right) aqueous suspensions.

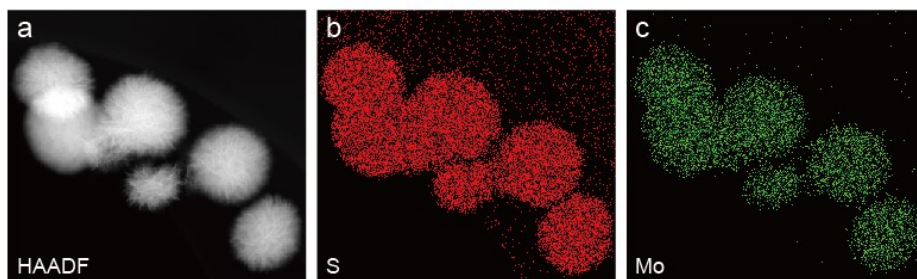

Figure S3. HAADF image of 2H-MoS<sub>2</sub> (a), EDS mapping of S (b) and Mo (c).

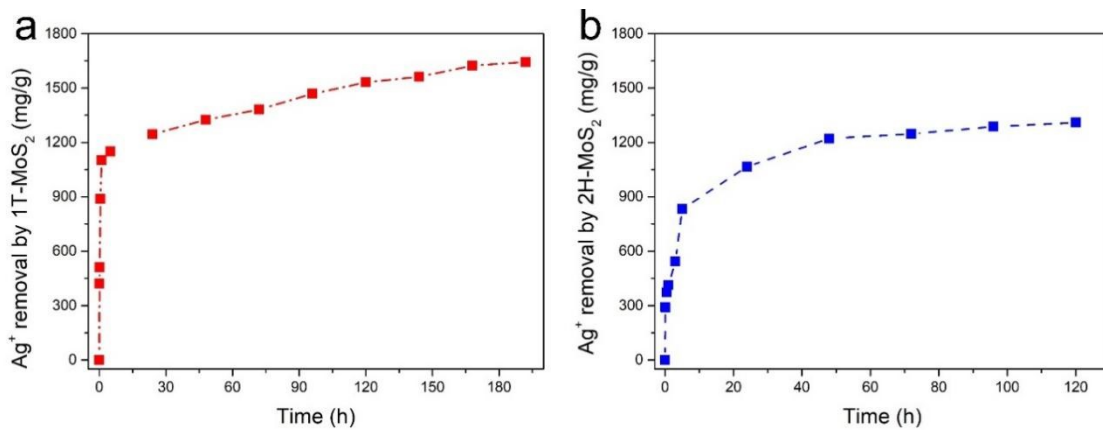

Figure S4. Ag<sup>+</sup> removals by 1T- (a) and 2H-MoS<sub>2</sub> (b) as a function of reaction time.

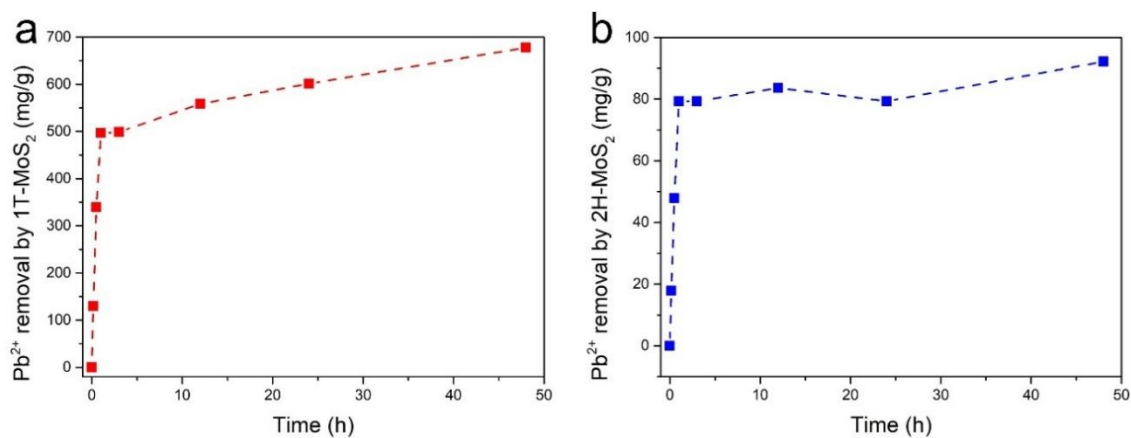

Figure S5. Pb<sup>2+</sup> removals by 1T- (a) and 2H-MoS<sub>2</sub> (b) as a function of reaction time.



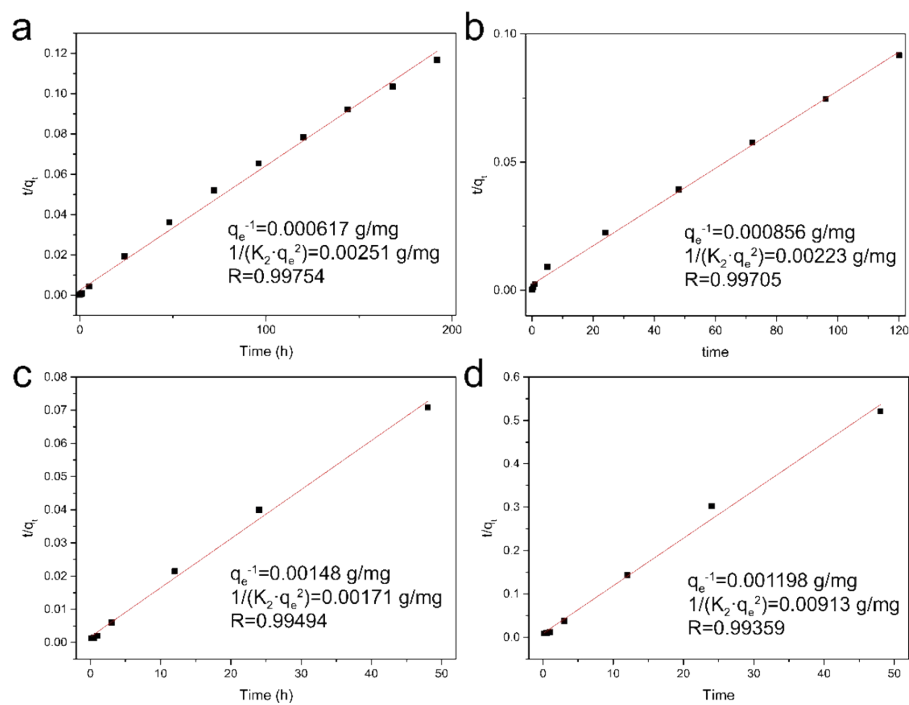

Figure S6. Second-order fitting for the heavy metal ions removal kinetics by using the linear-form formula  $\frac{t}{q_t} = \frac{1}{K_2 q_e^2} + \frac{t}{q_e}$ . Removal kinetics of (a) Ag<sup>+</sup> by 1T-MoS<sub>2</sub>; (b) Ag<sup>+</sup> by 2H-MoS<sub>2</sub>; (c) Pb<sup>2+</sup> by 1T-MoS<sub>2</sub> and (d) Pb<sup>2+</sup> by 2H-MoS<sub>2</sub>.

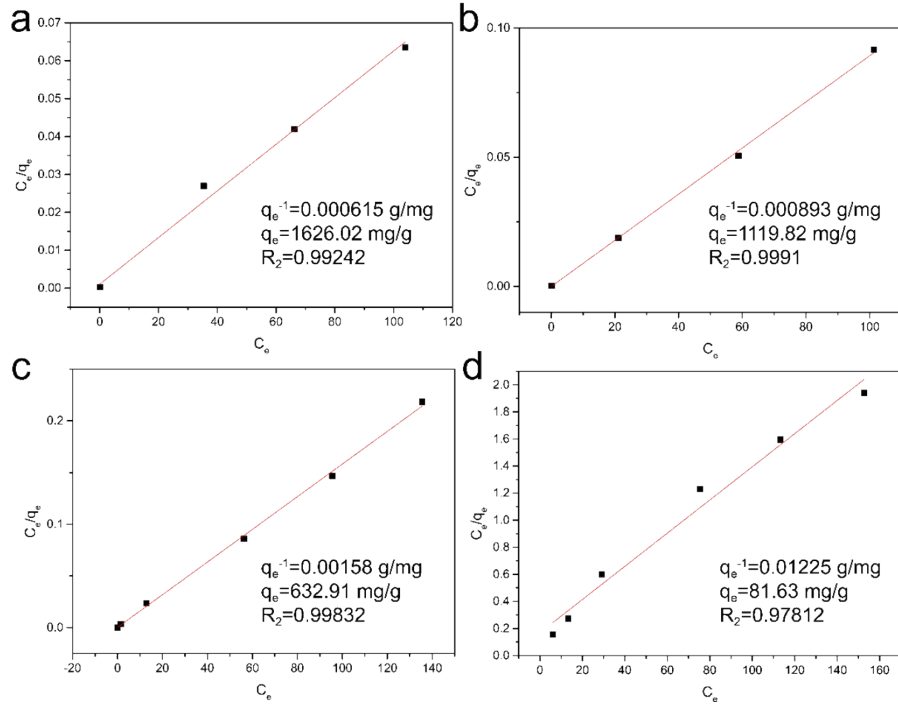

Figure S7. Langmuir fitting of adsorption curves of the heavy metal ions by MoS<sub>2</sub> in Fig. 3. Linear form of

Langmuir isothermal model was  $\frac{C_e}{q_e} = \frac{1}{q_0 K_L} + \frac{1}{q_0} C_e$  ( $C_e$  was equilibrium concentration,  $q_e$  was equilibrium adsorption capacity,  $K_L$  was Langmuir constant). (a) Fitting of Ag<sup>+</sup> removal by 1T-MoS<sub>2</sub>; (b) fitting of Ag<sup>+</sup> removal by 2H-MoS<sub>2</sub>; (c) fitting of Pb<sup>2+</sup> removal by 1T-MoS<sub>2</sub>; (d) fitting of Pb<sup>2+</sup> removal by 2H-MoS<sub>2</sub>.

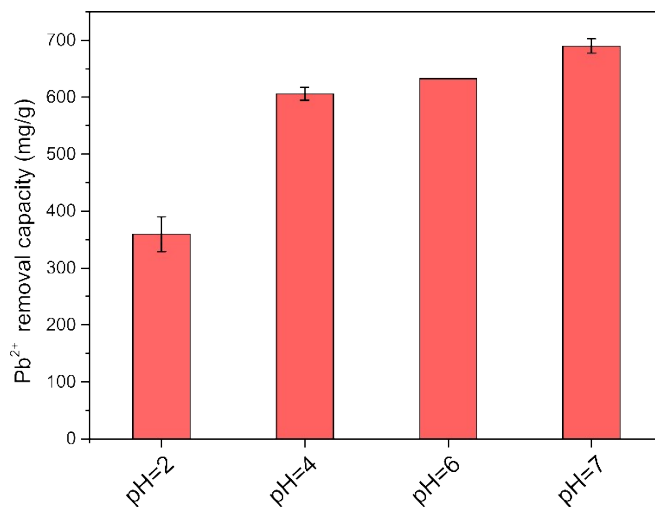

Figure S8. Pb<sup>2+</sup> removals by 1T-MoS<sub>2</sub> nanosheets at different pH conditions.

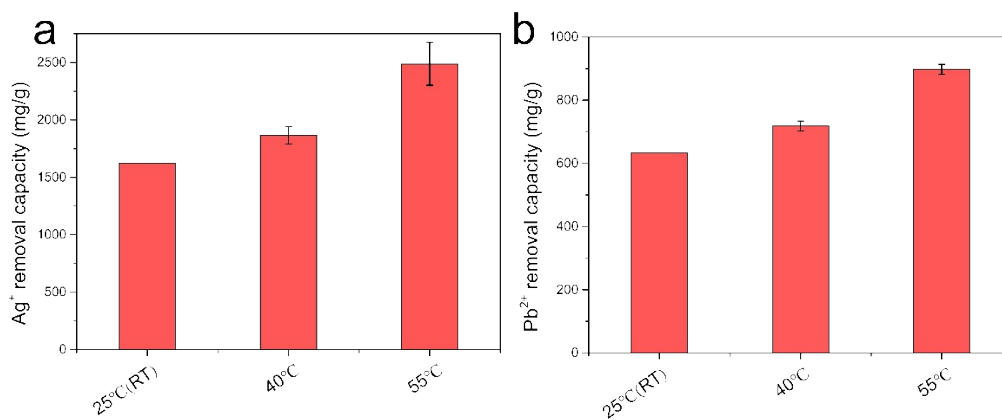

Figure S9. Ag<sup>+</sup> and Pb<sup>2+</sup> removals by 1T-MoS<sub>2</sub> nanosheets at different temperatures.

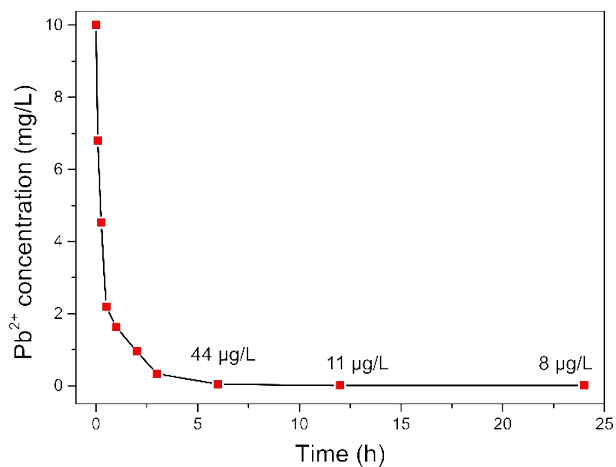

Figure S10. Removal kinetics of Pb<sup>2+</sup> by 1T-MoS<sub>2</sub> within 1 d. The initial concentrations of Pb and MoS<sub>2</sub> were 10 and 100 mg/L, respectively.

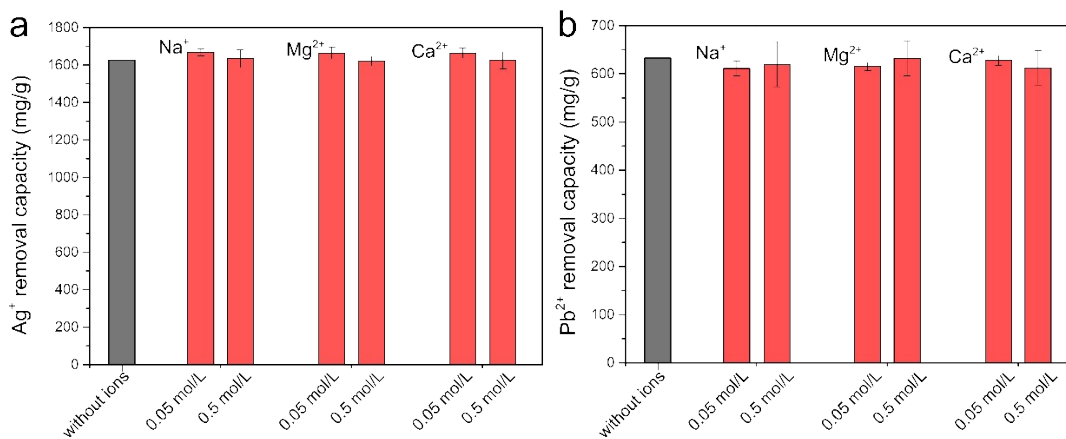

Figure S11 Removal capacity of (a) Ag<sup>+</sup> and (b) Pb<sup>2+</sup> by 1T-MoS<sub>2</sub> (50 mg/L) in the absence and presence of common cations (Na<sup>+</sup>, Mg<sup>2+</sup>, Ca<sup>2+</sup>) in different concentrations at pH 6. The initial concentration of Ag<sup>+</sup> or Pb<sup>2+</sup> is 150 mg/L.

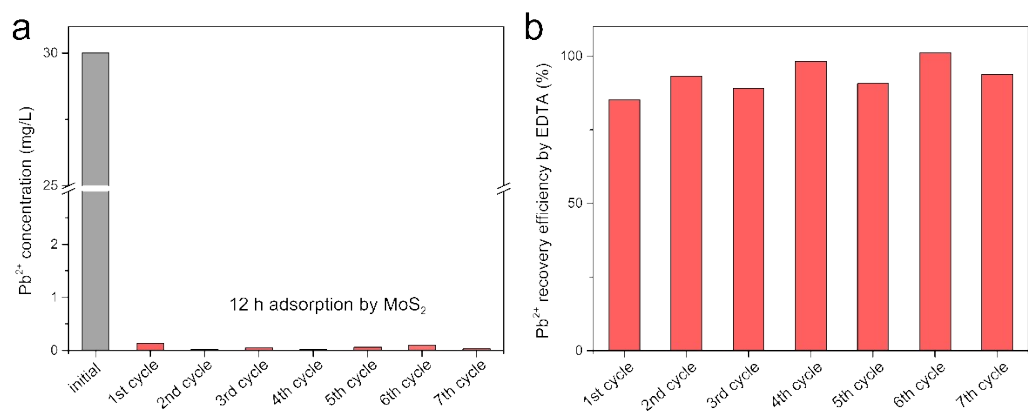

Figure S12. (a) Pb removals by stacked MoS<sub>2</sub> and (b) EDTA recovery efficiency in 7 consecutive tests.

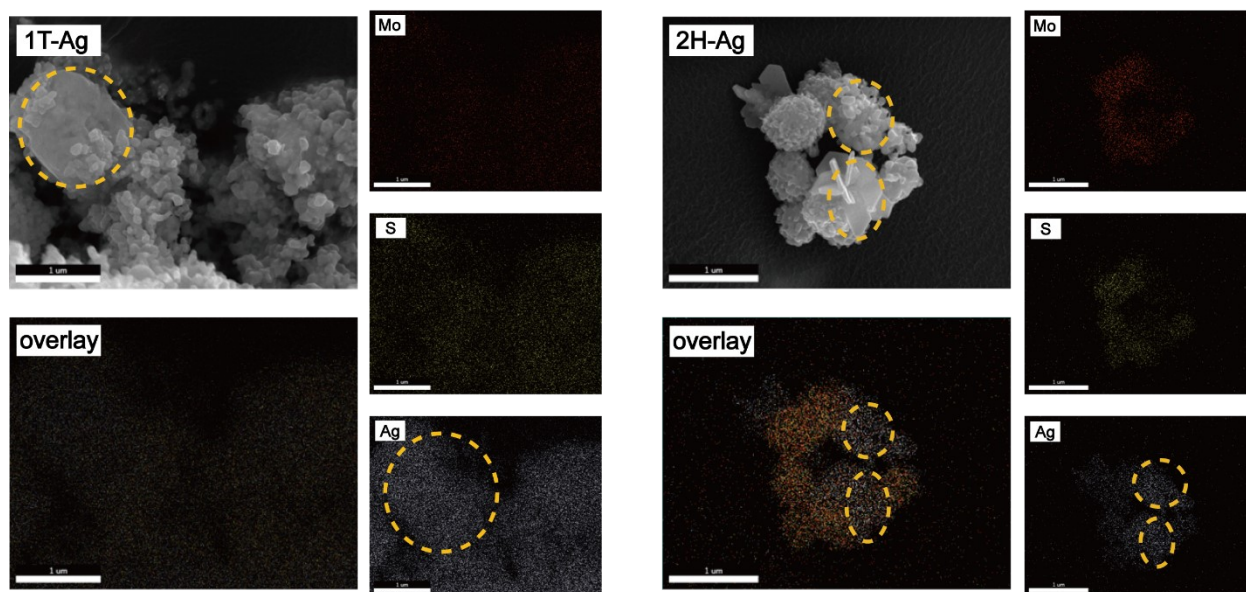

Figure S13. SEM images and EDS mapping of 1T-MoS<sub>2</sub>-Ag<sup>+</sup> and 2H-MoS<sub>2</sub>-Ag<sup>+</sup>. The regions highlighted with orange dash line represent the presence of metallic Ag.

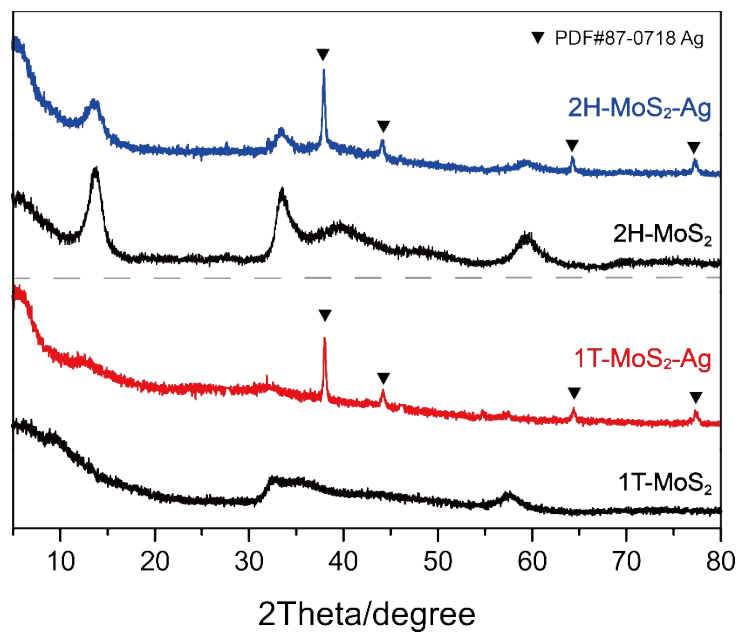

Figure S14. XRD patterns of 1T- and 2H-MoS<sub>2</sub> before and after Ag<sup>+</sup> removal.

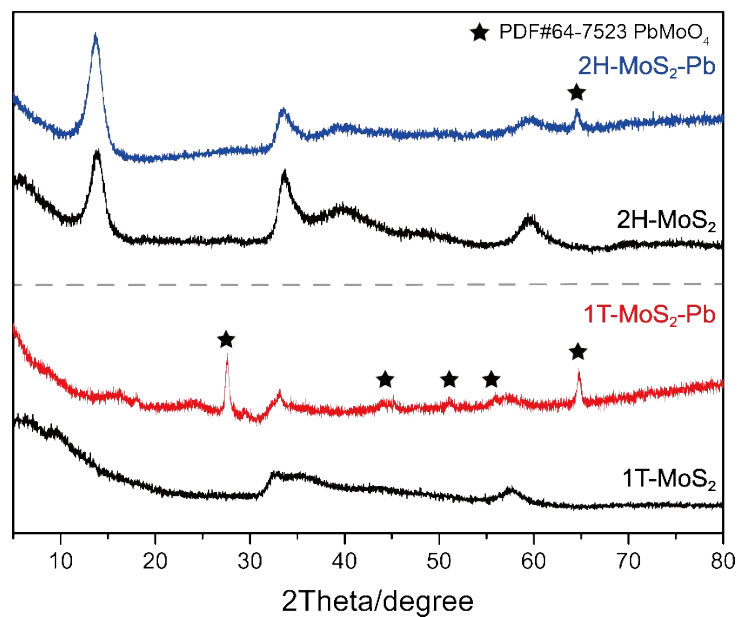

Figure S15. XRD patterns of 1T- and 2H-MoS<sub>2</sub> before and after Pb<sup>2+</sup> removal.

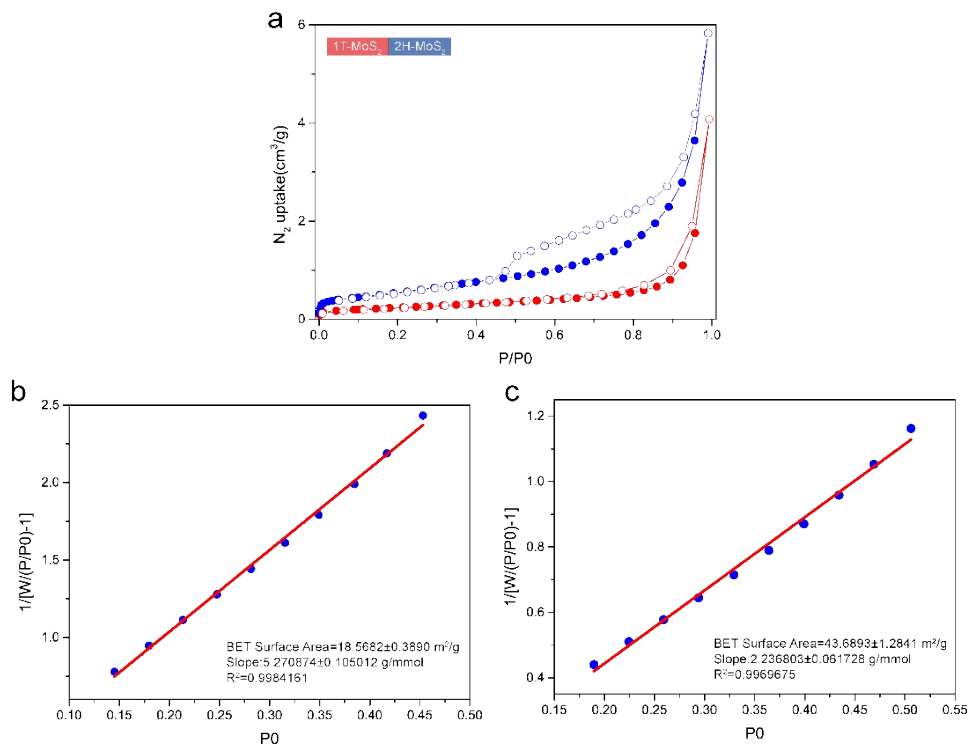

Figure S16.  $N_2$  adsorption isotherm of 1T- and 2H-MoS<sub>2</sub> (a). BET surface area of 1T-MoS<sub>2</sub> (b). BET surface area of 2H-MoS<sub>2</sub> (c).

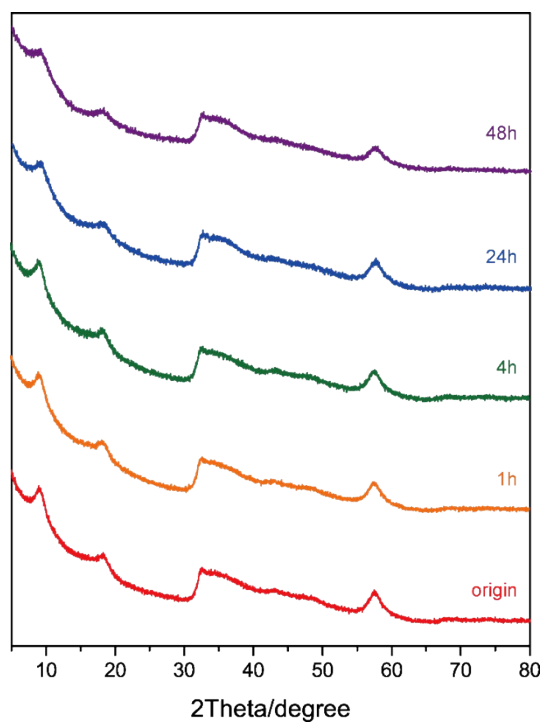

Figure S17. XRD patterns of as-synthesized 1T-MoS<sub>2</sub> sample dried in air from 1h to 48h.

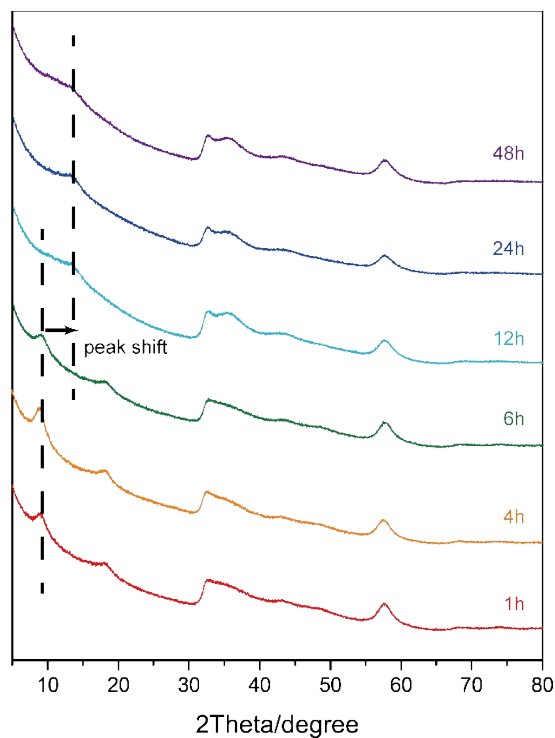

Figure S18. XRD pattern of as-synthesized 1T-MoS<sub>2</sub> sample dried in N<sub>2</sub> from 1h to 48h.

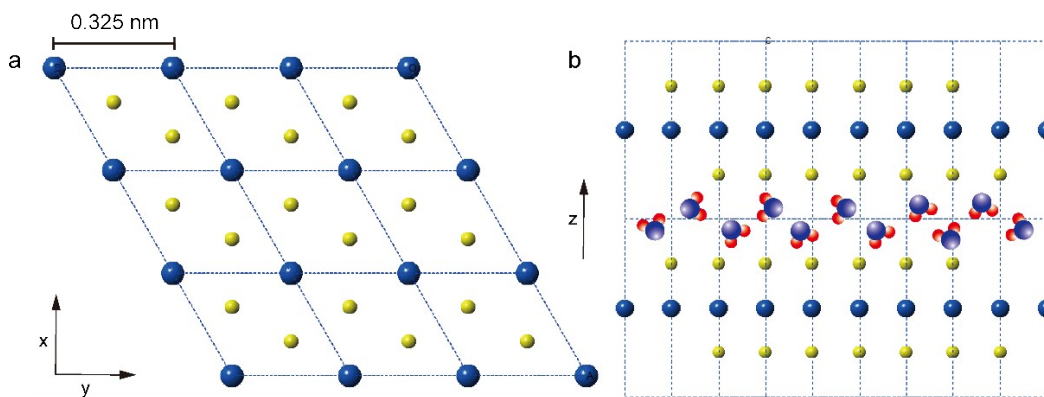

Figure S19. Crystal structure of 1T-MoS<sub>2</sub> in (a) the x-y plane and (b) the z direction (Yellow circles represent Mo atoms, blue circles represent S atoms). For as-synthesized 1T-MoS<sub>2</sub>, an ~8 % weight loss was detected in the heating process at ~ 100°C. The lattice parameters of 1T-MoS<sub>2</sub> are  $a=b=3.25\text{\AA}$ ,  $c=6.14\text{\AA}$ ,  $\alpha=\beta=90^\circ$ ,  $\gamma=120^\circ$ . The area of the 9-lattice crystal plane is  $9.506 \times 10^{-19}\text{ m}^2$ . There are 16 molecules of MoS<sub>2</sub> in a 9-lattice unit cell, and 8 % of the total mass is accounted for by about 11.4 water molecules. The volume of a single water molecule is  $3 \times 10^{-29}\text{ m}^3$ , so the volume of 11.4 water molecules is  $3.42 \times 10^{-28}\text{ m}^3$ . If they

are uniformly distributed throughout the crystal plane, the interlayer will increase by  $\frac{3.42 \times 10^{-28}}{9.506 \times 10^{-19}} = 0.36\text{ nm}$ .



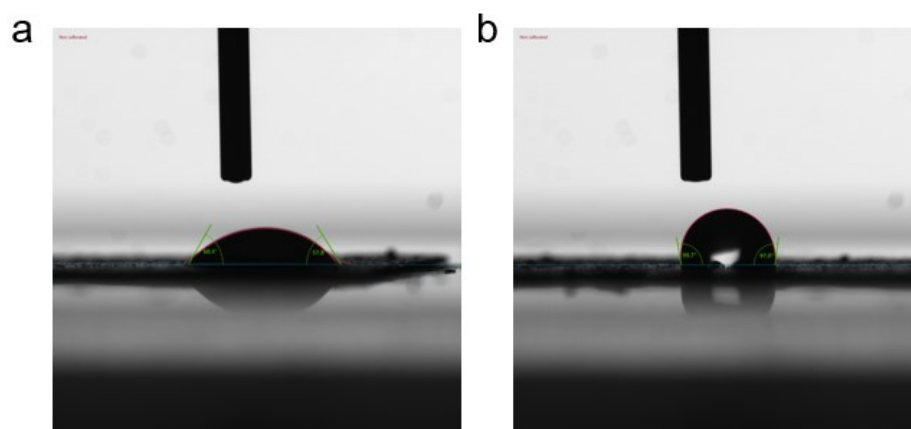

Figure S20. Contact angle testing of 1T-MoS<sub>2</sub> (a), 2H-MoS<sub>2</sub> (b).

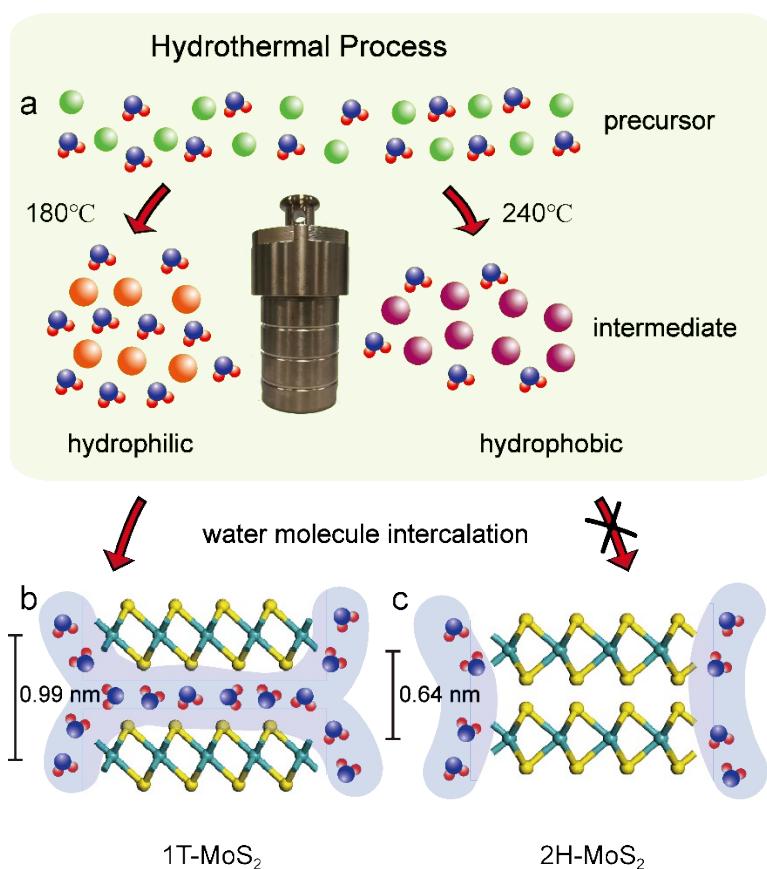

Figure S21. The schematic illustration of the formation process of spacing-varied nanochannels in 1T- and 2H-MoS<sub>2</sub> samples.

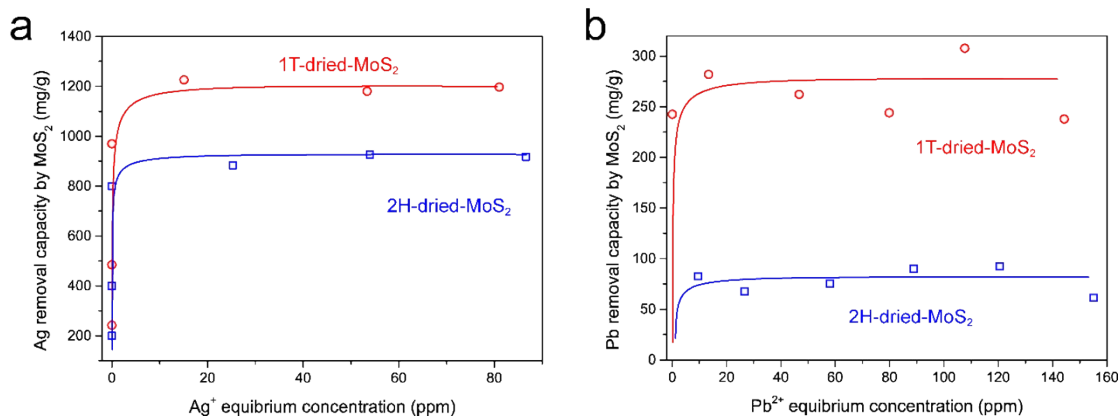

Figure S22. Removal capacity of Ag<sup>+</sup> by dried 1T, 2H-MoS<sub>2</sub> (a) and Pb<sup>2+</sup> by dried 1T-, 2H-MoS<sub>2</sub> (b). The initial concentrations of Ag<sup>+</sup>, Pb<sup>2+</sup> were 160 mg/L, and 1T-, 2H-MoS<sub>2</sub> concentration were 66 mg/L, 80 mg/L, respectively.

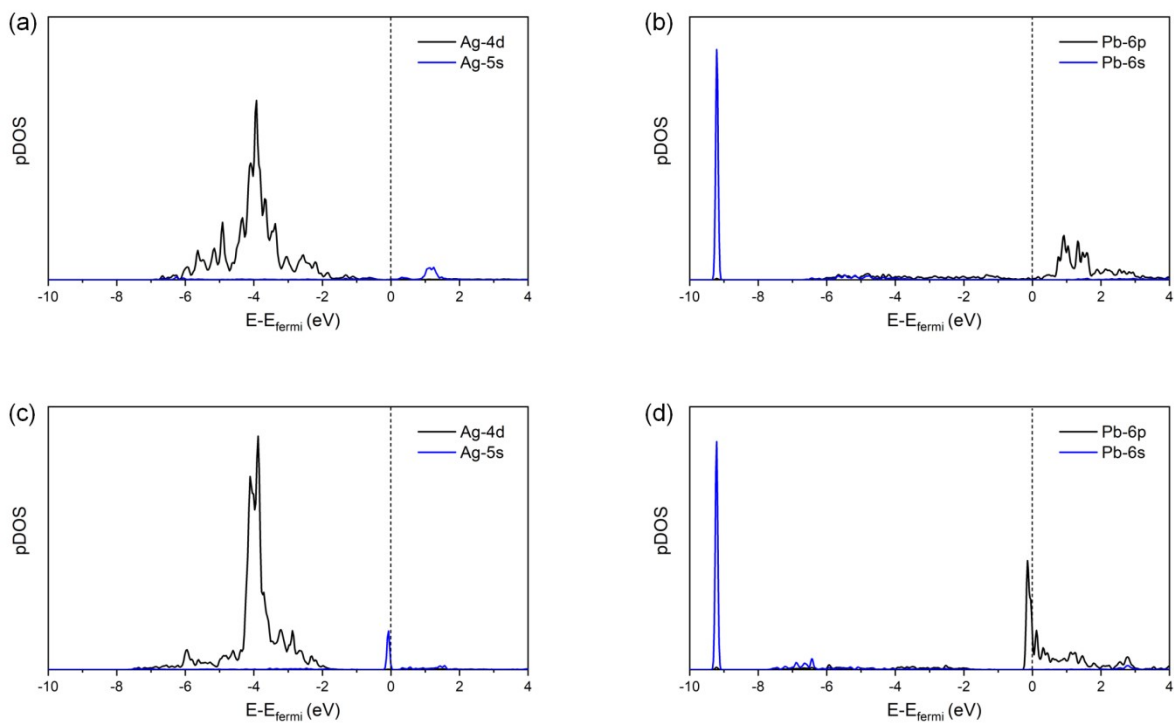

Figure S23. The projected density of states (pDOS). 4d, 5s orbitals of adsorbed Ag species and the 3p orbital of S on (a) 1T-MoS<sub>2</sub> and (c) 2H-MoS<sub>2</sub>. 6p, 6s orbitals of adsorbed Pb species and 3p orbital of S on (b) 1T-MoS<sub>2</sub> and (d) 2H-MoS<sub>2</sub>.

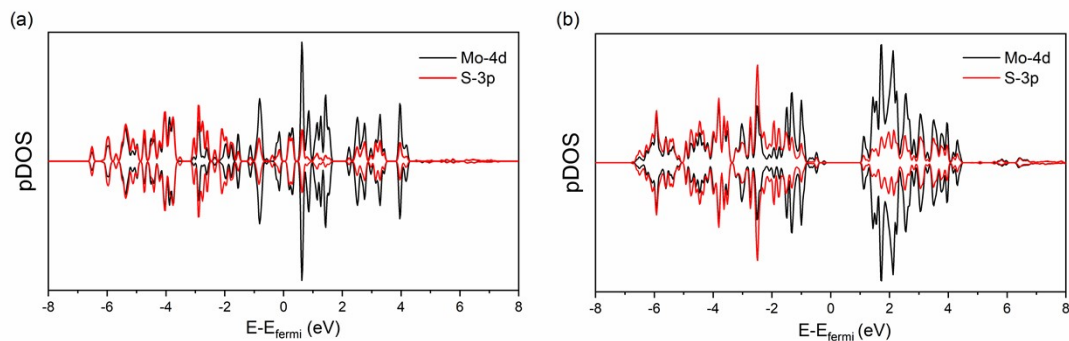

Figure S24. The projected density of states (pDOS) analysis for (a) 1T MoS<sub>2</sub> and (b) 2H-MoS<sub>2</sub>. The band gap of 1T-MoS<sub>2</sub> is smaller than that of 2H-MoS<sub>2</sub>, indicating that the 1T-MoS<sub>2</sub> is metallic, while the 2H phase of MoS<sub>2</sub> is semiconducting.

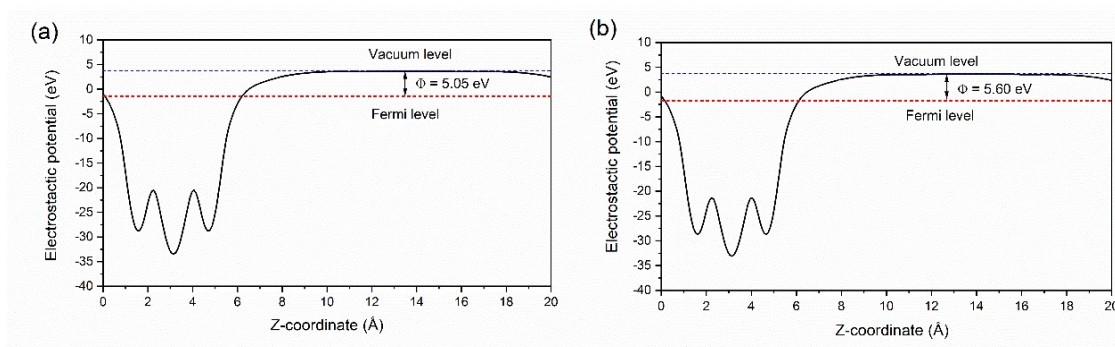

Figure S25. The work-functions ( $\Phi$ ) of (a) 1T-MoS<sub>2</sub> and (b) 2H-MoS<sub>2</sub>.

## Reference

1. Zhang, H.; Gu, L.; Zhang, L.; Zheng, S.; Wan, H.; Sun, J.; Zhu, D.; Xu, Z., Removal of aqueous Pb(II) by adsorption on Al<sub>2</sub>O<sub>3</sub>-pillared layered MnO<sub>2</sub>. *Appl. Surf. Sci.* **2017**, *406*, 330-338.
2. Liu, X.; Lai, D.; Wang, Y., Performance of Pb(II) removal by an activated carbon supported nanoscale zero-valent iron composite at ultralow iron content. *J. Hazard. Mater.* **2019**, *361*, 37-48.
3. Tan, Y.; Chen, M.; Hao, Y., High efficient removal of Pb (II) by amino-functionalized Fe<sub>3</sub>O<sub>4</sub> magnetic nano-particles. *Chem. Eng. J.* **2012**, *191*, 104-111.
4. Karthik, R.; Meenakshi, S., Removal of Pb(II) and Cd(II) ions from aqueous solution using polyaniline grafted chitosan. *Chem. Eng. J.* **2015**, *263*, 168-177.
5. Ren, X.; Shao, D.; Yang, S.; Hu, J.; Sheng, G.; Tan, X.; Wang, X., Comparative study of Pb(II) sorption on XC-72 carbon and multi-walled carbon nanotubes from aqueous solutions. *Chem. Eng. J.* **2011**, *170*, (1), 170-177.
6. Abdollahi, N.; Akbar Razavi, S. A.; Morsali, A.; Hu, M.-L., High capacity Hg(II) and Pb(II) removal using MOF-based nanocomposite: Cooperative effects of pore functionalization and surface-charge modulation. *J. Hazard. Mater.* **2020**, *387*, 121667.
7. Bao, S.; Yang, W.; Wang, Y.; Yu, Y.; Sun, Y., One-pot synthesis of magnetic graphene oxide composites as an efficient and recoverable adsorbent for Cd(II) and Pb(II) removal from aqueous solution. *J. Hazard. Mater.* **2020**, *381*, 120914.
8. Fan, J.; Cai, C.; Chi, H.; Reid, B. J.; Coulon, F.; Zhang, Y.; Hou, Y., Remediation of cadmium and lead polluted soil using thiol-modified biochar. *J. Hazard. Mater.* **2020**, *388*, 122037.
9. Wang, Z.; Tu, Q.; Sim, A.; Yu, J.; Duan, Y.; Poon, S.; Liu, B.; Han, Q.; Urban, J. J.; Sedlak, D.; Mi, B., Superselective Removal of Lead from Water by Two-Dimensional MoS<sub>2</sub> Nanosheets and Layer-Stacked Membranes. *Environ. Sci. Technol.* **2020**.
10. Luo, J.; Fu, K.; Sun, M.; Yin, K.; Wang, D.; Liu, X.; Crittenden, J. C., Phase-Mediated Heavy Metal Adsorption from Aqueous Solutions Using Two-Dimensional Layered MoS<sub>2</sub>. *ACS Appl. Mater. Interfaces* **2019**, *11*, (42), 38789-38797.
11. Jayadharan Salini, A. N.; Ramachandran, A.; Sadasivakurup, S.; Yesodha, S. K., Versatile MoS<sub>2</sub> hollow nanoroses for a quick-witted removal of Hg (II), Pb (II) and Ag (I) from water and the mechanism: Affinity or Electrochemistry? *Appl. Mater. Today.* **2020**, *20*, 100642.
12. Liu, Y.; Ma, C.; Zhang, X.; Ngo, H. H.; Guo, W.; Zhang, M.; Zhang, D., Role of structural characteristics of MoS<sub>2</sub> nanosheets on Pb<sup>2+</sup> removal in aqueous solution. *Environ. Technol. Innovation* **2021**, *22*, 101385.
13. Kumar, N.; Fosso-Kankeu, E.; Ray, S. S., Achieving Controllable MoS<sub>2</sub> Nanostructures with Increased Interlayer Spacing for Efficient Removal of Pb(II) from Aquatic Systems. *ACS Appl. Mater. Interfaces* **2019**, *11*, (21), 19141-19155.
14. Liu, C.; Zeng, S.; Yang, B.; Jia, F.; Song, S., Simultaneous removal of Hg<sup>2+</sup>, Pb<sup>2+</sup> and Cd<sup>2+</sup> from aqueous solutions on multifunctional MoS<sub>2</sub>. *J. Mol. Liq.* **2019**, *296*, 111987.
15. Wang, J.; Zhang, W.; Yue, X.; Yang, Q.; Liu, F.; Wang, Y.; Zhang, D.; Li, Z.; Wang, J., One-pot synthesis of multifunctional magnetic ferrite–MoS<sub>2</sub>–carbon dot nanohybrid adsorbent for efficient Pb(ii) removal. *Journal of Materials Chemistry A* **2016**, *4*, (10), 3893-3900.
16. Pytlakowska, K.; Kocot, K.; Hachuła, B.; Pilch, M.; Wrzalik, R.; Zubko, M., Determination of heavy metal ions by energy dispersive X-ray fluorescence spectrometry using

reduced graphene oxide decorated with molybdenum disulfide as solid adsorbent. *Spectrochim. Acta, Part B* **2020**, *167*, 105846.

17. Zhu, H.; Tan, X.; Tan, L.; Chen, C.; Alharbi, N. S.; Hayat, T.; Fang, M.; Wang, X., Biochar Derived from Sawdust Embedded with Molybdenum Disulfide for Highly Selective Removal of Pb<sup>2+</sup>. *ACS Appl. Nano Mater.* **2018**, *1*, (6), 2689-2698.

18. Zolgharnein, J.; Rastgordani, M., Multivariate optimization and characterization of simultaneous removal of binary mixture of Cu(II) and Pb(II) using Fe<sub>3</sub>O<sub>4</sub>@MoS<sub>2</sub> nanoparticles. *J. Chemom.* **2018**, *32*, (9), e3043.

19. Wang, Q.; Peng, L.; Gong, Y.; Jia, F.; Song, S.; Li, Y., Mussel-inspired Fe<sub>3</sub>O<sub>4</sub>@Polydopamine(PDA)-MoS<sub>2</sub> core-shell nanosphere as a promising adsorbent for removal of Pb<sup>2+</sup> from water. *J. Mol. Liq.* **2019**, *282*, 598-605.

20. Pandey, S.; Fosso-Kankeu, E.; Spiro, M. J.; Waanders, F.; Kumar, N.; Ray, S. S.; Kim, J.; Kang, M., Equilibrium, kinetic, and thermodynamic studies of lead ion adsorption from mine wastewater onto MoS<sub>2</sub>-clinoptilolite composite. *Mater. Today Chem.* **2020**, *18*, 100376.

21. Wang, Z.; Zhang, J.; Wen, T.; Liu, X.; Wang, Y.; Yang, H.; Sun, J.; Feng, J.; Dong, S.; Sun, J., Highly effective remediation of Pb(II) and Hg(II) contaminated wastewater and soil by flower-like magnetic MoS<sub>2</sub> nanohybrid. *Science of The Total Environment* **2020**, *699*, 134341.
